# Supplementary material for: Outcome of Completion Surgery after Endoscopic Submucosal Dissection in Early-Stage Colorectal Cancer Patients
Source: Cancers (Basel). 2023 Sep 9;15(18):4490. doi: 10.3390/cancers15184490 (PMC10526268; doi:10.3390/cancers15184490)
Supplement: Supplementary file 1 [file cancers-15-04490-s001.zip › Additional table S1.pdf]

**Additional table S1.** Histological high-risk features of pT1CRC patients in the completion surgery group.

| Histological feature    | pT1CRC completion surgery group (n=39) |
|-------------------------|----------------------------------------|
| Invasion depth          |                                        |
| Invasion Sm2/3 or >1000 | 17 (60.7)                              |
| Superficial             | 4 (14.3)                               |
| Not assessable          | 7 (25)                                 |
| Not described           | 11                                     |
| Lymphovascular invasion |                                        |
| Present/suspect         | 20 (60.6)                              |
| Absent                  | 13 (39.4)                              |
| Not described           | 6                                      |
| Differentiation grade   |                                        |
| Poor/Mucinous           | 5 (14.3)                               |
| Well/Moderate           | 30 (85.7)                              |
| Not described           | 4                                      |
| Budding                 |                                        |
| High grade              | 7 (30.4)                               |
| Absent or low grade     | 12 (52.2)                              |
| Not assessable          | 4 (17.4)                               |
| Not described           | 16                                     |

CRC, colorectal cancer.
