# Supplementary material for: Outcome of Completion Surgery after Endoscopic Submucosal Dissection in Early-Stage Colorectal Cancer Patients
Source: Cancers (Basel). 2023 Sep 9;15(18):4490. doi: 10.3390/cancers15184490 (PMC10526268; doi:10.3390/cancers15184490)
Supplement: Supplementary file 1 [file cancers-15-04490-s001.zip › Additional table S2.pdf]

**Additional table S2.** Comparison completion TME and primary TME.

| <b>Outcome variable</b>            | <b>Odds ratio (95% CI)</b> | <b>P value</b> |
|------------------------------------|----------------------------|----------------|
| Lymph nodes harvested <sup>1</sup> | 0.997 (0.434-2.287)        | 0.993          |
| Stoma after surgery                | 1.532 (0.648-3.623)        | 0.331          |
| Adverse events <90 days            | 1.298 (0.557-3.023)        | 0.546          |
| Surgical adverse events            | 1.376 (0.532-3.558)        | 0.510          |
| Reintervention required            | 1.659 (0.628-4.383)        | 0.307          |
| Stoma by reintervention            | 2.491 (0.779-7.965)        | 0.124          |
| ICU admission due to complication  | 0.270 (0.031-2.323)        | 0.233          |
| Permanent injury                   | NA, no events              | NA             |
| 90-day mortality                   | NA, no events              | NA             |

<sup>1</sup> Variable was dichotomized, using 12 lymph nodes as cut-off.

TME, total mesorectal excision; CI, confidence interval; ICU, intensive care unit; NA, not applicable.
